# Supplementary material
Source: PubMed Central journal article supplement (PMC2614216)
Supplement: NIHMS81437-supplement-Supplemental_D.pdf [file NIHMS81437-supplement-Supplemental_D.pdf]

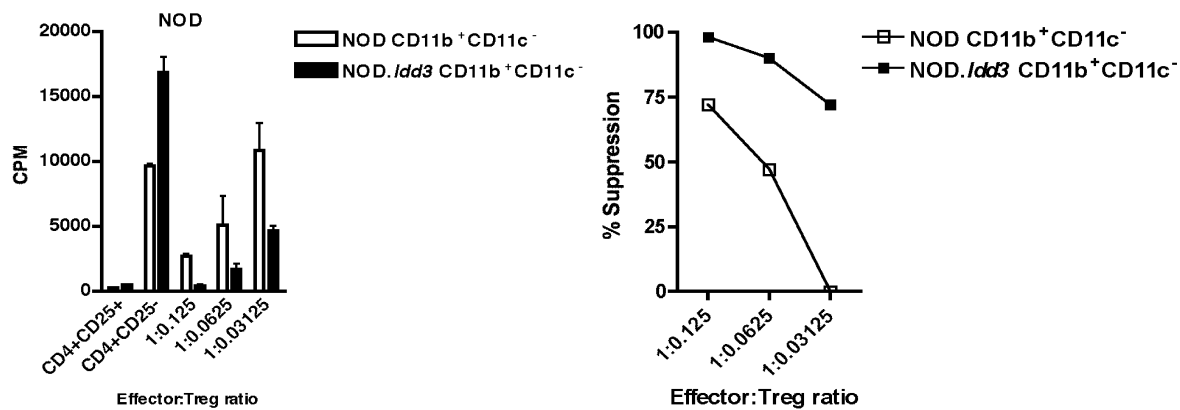

Supplementary Figure 1. Regulatory T cell function in the presence of NOD and NOD.*Idd3* CD11b<sup>+</sup>CD11c<sup>-</sup> APC.

NOD CD4<sup>+</sup>CD25<sup>+</sup> Tregs (7.5x10<sup>4</sup>/well) and CD4<sup>+</sup>CD25<sup>-</sup> effectors (7.5x10<sup>4</sup>/well) were stimulated with either NOD or NOD.*Idd3* CD11b<sup>+</sup>CD11c<sup>-</sup> APC (3.75x10<sup>4</sup>/well) in the presence of soluble anti-CD3 (1 µg/ml). Percent suppression by NOD Tregs of NOD effectors cultured with CD11b<sup>+</sup>CD11c<sup>-</sup> NOD APC (open squares) or CD11b<sup>+</sup>CD11c<sup>-</sup> NOD.*Idd3* APC (closed squares). Similar results were obtained in an independent assay.
